# Supplementary material for: Filgotinib versus placebo or adalimumab in patients with rheumatoid arthritis and inadequate response to methotrexate: a phase III randomised clinical trial
Source: PubMed Central journal article supplement — Ann Rheum Dis. 2021 Jan 27;80(7):848–58. doi: 10.1136/annrheumdis-2020-219214 (PMC8237199; doi:10.1136/annrheumdis-2020-219214), 2021-01-27
Supplement: annrheumdis-2020-219214supp001.pdf [file annrheumdis-2020-219214supp001.pdf]

Filgotinib  
Protocol GS-US-417-0301  
Gilead Sciences, Inc.

Final  
Amendment 1

## Appendix 1. Investigator Signature Page

### GILEAD SCIENCES, INC.

#### STUDY ACKNOWLEDGEMENT

A Randomized, Double-blind, Placebo- and Active-controlled, Multicenter, Phase 3 Study to Assess the Efficacy and Safety of Filgotinib Administered for 52 weeks in Combination with Methotrexate to Subjects with Moderately to Severely Active Rheumatoid Arthritis Who Have an Inadequate Response to Methotrexate

**GS-US-417-0301, Amendment 1 Protocol , 05 July 2016**

This protocol has been approved by Gilead Sciences, Inc. The following signature documents this approval.

FRANZISKA MATZKIES, MD  
Name (Printed)  
Author

  
Signature

06 - July - 2016  
Date

#### INVESTIGATOR STATEMENT

I have read the protocol, including all appendices, and I agree that it contains all necessary details for me and my staff to conduct this study as described. I will conduct this study as outlined herein and will make a reasonable effort to complete the study within the time designated.

I will provide all study personnel under my supervision copies of the protocol and access to all information provided by Gilead Sciences, Inc. I will discuss this material with them to ensure that they are fully informed about the drugs and the study.

\_\_\_\_\_  
Principal Investigator Name (Printed)

\_\_\_\_\_  
Signature

\_\_\_\_\_  
Date

\_\_\_\_\_  
Site Number

CONFIDENTIAL

Page 100

05 July 2016
