# Supplementary material for: Filgotinib versus placebo or adalimumab in patients with rheumatoid arthritis and inadequate response to methotrexate: a phase III randomised clinical trial
Source: PubMed Central journal article supplement — Ann Rheum Dis. 2021 Jan 27;80(7):848–58. doi: 10.1136/annrheumdis-2020-219214 (PMC8237199; doi:10.1136/annrheumdis-2020-219214), 2021-01-27
Supplement: annrheumdis-2020-219214supp004.pdf [file annrheumdis-2020-219214supp004.pdf]

## SUPPLEMENTARY MATERIAL

### Supplementary methods

#### *Assessment of radiographic progression based on van der Heijde modified total Sharp score*

The van der Heijde modified total Sharp score (mTSS) was assigned by 2 central readers blinded to treatment, patient information, and chronological order of the radiographs; average value is reported. Results reported for baseline, week 12, and week 24 were based on readings of radiographs obtained at screening, week 12, and week 24 or pretermination visit before week 24 (Campaign A). Week 52 results were based on readings of radiographs obtained at screening, week 24, and week 52 or pretermination visit after week 24 (Campaign B) combined with Campaign A results.

#### *Statistical analysis*

##### Noninferiority analyses

The noninferiority test of the proportions of patients achieving Disease Activity Score in 28 joints with C-reactive protein (DAS28[CRP])  $\leq 3.2$  and  $< 2.6$  at week 12 assessed whether each filgotinib dose preserves more than 50% of the effect of adalimumab compared with placebo (minimum effect fraction = 0.5). The minimum effect fraction of 0.5 was chosen based on published methods suggesting a fraction of 0.5–0.99 for noninferiority and a similar trial of tofacitinib employing a noninferiority margin based on 50% of the treatment difference for adalimumab[1-3].

##### Sensitivity analyses

The multiple imputation procedure replaced each missing value with a set of plausible values that represented the uncertainty about the right value to impute. Fifty imputed data sets were generated based on logistic regression models for binary efficacy endpoints (eg, ACR20) or linear regression models for continuous efficacy end points (eg, Health Assessment Questionnaire-Disability Index). These multiple imputed data sets were analysed using the same method as for the primary analysis. The results from each set of imputed data sets were combined using Rubin's rule.[4] The stratification factors were included in

the imputation model as covariates, and all available data at postbaseline visits up to the time point of interest were included in the model.

All statistical analyses were done using SAS version 9.4 (SAS Institute).

## Supplementary results

### *Narratives of deaths*

1. The acute DVT-associated death occurred in a patient in their 60s with risk factors of obesity, history of tobacco use, African descent, and cardiovascular disease. The patient started placebo on study day 1 and was rerandomised to filgotinib 200 mg (FIL200) on study day 169. The patient received FIL200 for 37 days before study drug discontinuation on day 205 due to persistent anaemia, radiographic finding of pneumoperitoneum, and weight loss. Investigation did not identify an underlying cause. The patient experienced ischaemic stroke and DVT considered related to study drug on day 219 (13 days after the last dose of filgotinib), followed by pulmonary embolism on day 220, and death on day 224. Investigation revealed bilateral pulmonary emboli with scattered interstitial opacities of the bilateral upper and lower lobes concerning for pulmonary infarcts and deep venous thrombosis of the femoral vein (thrombus within the bilateral popliteal veins with extension into the inferior femoral vein on the left). There was no evidence of right heart strain. The patient was also found to have cardiomegaly with patent foramen ovale, which could explain the distal internal carotid artery, middle cerebral artery, and posterior cerebral artery occlusions.

2. The primary varicella infection-associated death occurred in a patient in their 30s with unknown history of childhood chicken pox or varicella vaccination who completed study treatment with filgotinib 100 mg (after rerandomisation from placebo) on day 361—the end of the study—and continued receiving methotrexate and corticosteroids for treatment of rheumatoid arthritis. The patient presented 5 days after study drug discontinuation with a disseminated vascular rash diagnosed as varicella based on appearance. It is unknown if the patient had ever received varicella vaccination; however, the investigator noted that vaccination for chicken pox was uncommon in that region and there were 2 other patients

admitted to the same hospital with varicella infection within ~1 week of this event. The patient's death on day 368 was attributed to varicella and was considered related to study drug. No virology testing or autopsy was performed.

### Supplementary References

1. Fleischmann R, Mysler E, Hall S, et al. Efficacy and safety of tofacitinib monotherapy, tofacitinib with methotrexate, and adalimumab with methotrexate in patients with rheumatoid arthritis (ORAL Strategy): a phase 3b/4, double-blind, head-to-head, randomised controlled trial. *Lancet*. 2017;390(10093):457-68.
2. Koch GG, Tangen CM. Nonparametric analysis of covariance and its role in noninferiority clinical trials. *Drug Information Journal*. 1999;33:1145-59.
3. Liu JT, Tzeng CS, Tsou HH. Establishing non-inferiority of a new treatment in a three-arm trial: Apply a step-down hierarchical model in a papulopustular acne study and an oral prophylactic antibiotics study. *International Journal of Statistics in Medical Research*. 2014;3(1):11-20.
4. Rubin DB. Multiple Imputation for Nonresponse in Surveys. New York, NY: John Wiley & Sons, Inc, 1987.

**Table S1.** Noninferiority margins based on the difference of proportions of patients achieving DAS28(CRP)  $\leq 3.2$  or  $< 2.6$  between the adalimumab and placebo groups at weeks 12 and 24

|                                 | ADA  | PBO  | Noninferiority margin <sup>a</sup> |
|---------------------------------|------|------|------------------------------------|
|                                 | (%)  | (%)  | (%)                                |
| DAS28(CRP) $\leq 3.2$ , week 12 | 43.4 | 23.4 | 10.0                               |
| DAS28(CRP) $\leq 3.2$ , week 24 | 50.5 | 33.7 | 8.4                                |
| DAS28(CRP) $< 2.6$ , week 12    | 23.7 | 9.3  | 7.2                                |
| DAS28(CRP) $< 2.6$ , week 24    | 35.7 | 16.2 | 9.8                                |

<sup>a</sup>50% of the difference between ADA vs PBO.

ADA, adalimumab; DAS28(CRP), Disease Activity Score in 28 joints with C-reactive protein; PBO, placebo.

**Table S2.** Multiple imputation sensitivity analyses: Primary and secondary outcomes

|                                                  | <b>FIL200<br/>(n = 475)</b> | <b>FIL100<br/>(n = 480)</b> | <b>ADA<br/>(n = 325)</b> | <b>PBO<br/>(n = 475)</b> |
|--------------------------------------------------|-----------------------------|-----------------------------|--------------------------|--------------------------|
| <b>Primary outcome</b>                           |                             |                             |                          |                          |
| <b>ACR20, week 12</b>                            |                             |                             |                          |                          |
| % (95% CI)                                       | 79.1 (75.4 to 82.9)         | 73.9 (69.9 to 77.9)         | 73.8 (68.9 to 78.6)      | 53.3 (48.7 to 57.9)      |
| Difference vs PBO (95% CI)                       | 25.9 (20.0 to 31.8)         | 20.6 (14.5 to 26.7)         |                          |                          |
| Exploratory p vs PBO                             | <0.001                      | <0.001                      |                          |                          |
| <b>Key secondary outcomes</b>                    |                             |                             |                          |                          |
| <b>HAQ-DI change from baseline to week 12</b>    |                             |                             |                          |                          |
| N                                                | 462                         | 460                         | 315                      | 443                      |
| Mean ± SD                                        | -0.69 ± 0.61                | -0.56 ± 0.57                | -0.61 ± 0.56             | -0.42 ± 0.54             |
| Difference vs PBO (95% CI)                       | -0.29 (-0.35 to -0.22)      | -0.17 (-0.24 to -0.10)      |                          |                          |
| Exploratory p vs PBO                             | <0.001                      | <0.001                      |                          |                          |
| <b>DAS28(CRP) &lt;2.6, week 12</b>               |                             |                             |                          |                          |
| % (95% CI)                                       | 34.5 (30.2 to 38.8)         | 25.6 (21.6 to 29.6)         | 25.0 (20.3 to 29.8)      | 9.8 (7.1 to 12.5)        |
| Difference vs PBO (95% CI)                       | 24.7 (19.7 to 29.8)         | 15.8 (11.0 to 20.7)         |                          |                          |
| Exploratory p vs PBO                             | <0.001                      | <0.001                      |                          |                          |
| <b>mTSS change from baseline to week 24</b>      |                             |                             |                          |                          |
| N                                                | 428                         | 429                         | 283                      | 390                      |
| Mean ± SD                                        | 0.15 ± 1.1                  | 0.17 ± 0.89                 | 0.17 ± 0.94              | 0.36 ± 1.4               |
| Difference vs PBO (95% CI)                       | -0.24 (-0.39 to -0.08)      | -0.23 (-0.39 to -0.07)      |                          |                          |
| Exploratory p vs PBO                             | 0.003                       | 0.004                       |                          |                          |
| <b>Noninferiority DAS28(CRP) ≤3.2, week 12</b>   |                             |                             |                          |                          |
| % (95% CI)                                       | 50.6 (46.1 to 55.1)         | 41.5 (37.0 to 46.0)         | 45.4 (39.9 to 50.8)      | 24.3 (20.4 to 28.2)      |
| Difference vs ADA (95% CI)                       | 5.2 (-1.9 to 12.3)          | -3.9 (-10.9 to 3.2)         |                          |                          |
| Exploratory p vs ADA                             | <0.001                      | 0.02                        |                          |                          |
| <b>SF-36 PCS change from baseline to week 12</b> |                             |                             |                          |                          |
| N                                                | 465                         | 465                         | 315                      | 448                      |
| Mean ± SD                                        | 9.1 ± 8.1                   | 8.4 ± 7.7                   | 8.4 ± 7.8                | 5.7 ± 7.2                |
| Difference vs PBO (95% CI)                       | 3.7 (2.8 to 4.6)            | 3.1 (2.2 to 4.0)            |                          |                          |
| Exploratory p vs PBO                             | <0.001                      | <0.001                      |                          |                          |
| <b>FACIT-F change from baseline to week 12</b>   |                             |                             |                          |                          |

|                                                   |                    |                     |           |           |
|---------------------------------------------------|--------------------|---------------------|-----------|-----------|
| N                                                 | 458                | 457                 | 309       | 440       |
| Mean ± SD                                         | 9.2 ± 9.8          | 9.0 ± 10.2          | 8.8 ± 9.4 | 6.6 ± 9.9 |
| Difference vs PBO (95% CI)                        | 3.0 (2.0 to 4.1)   | 2.8 (1.7 to 3.9)    |           |           |
| Exploratory p vs PBO                              | <0.001             | <0.001              |           |           |
| <b>Superiority DAS28(CRP) ≤3.2, week 12</b>       |                    |                     |           |           |
| Difference vs ADA (95% CI)                        | 5.2 (-1.9 to 12.3) | -3.9 (-10.9 to 3.2) |           |           |
| Exploratory p vs ADA                              | 0.13               | 0.27                |           |           |
| <b>Noninferiority DAS28(CRP) &lt;2.6, week 12</b> |                    |                     |           |           |
| Difference vs ADA (95% CI)                        | 9.5 (3.0 to 15.9)  | 0.6 (-5.6 to 6.8)   |           |           |
| Exploratory p vs ADA                              | <0.001             | <0.001              |           |           |
| <b>Superiority DAS28(CRP) &lt;2.6, week 12</b>    |                    |                     |           |           |
| Difference vs ADA (95% CI)                        | 9.5 (3.0 to 15.9)  | 0.6 (-5.6 to 6.8)   |           |           |
| Exploratory p vs ADA                              | 0.004              | 0.86                |           |           |

Difference shown as difference in response rates for categorical outcomes and least-squares means difference for continuous outcomes.

ACR20, 20% improvement from baseline in American College of Rheumatology core criteria; ADA, adalimumab; CI, confidence interval;

DAS28(CRP), Disease Activity Score in 28 joints with C-reactive protein; FACIT-F, Functional Assessment of Chronic Illness Therapy-Fatigue;

FIL100, filgotinib 100 mg; FIL200, filgotinib 200 mg; HAQ-DI, Health Assessment Questionnaire-Disability Index; mTSS, van der Heijde

modified total Sharp score; PBO, placebo; SD, standard deviation; SF-36 PCS, Short Form-36 Physical Component Summary.

**Table S3.** Additional efficacy data through week 52

|                                           | <b>FIL200<br/>(n = 475)</b> | <b>FIL100<br/>(n = 480)</b> | <b>ADA<br/>(n = 325)</b> | <b>PBO<br/>(n = 475)</b> |
|-------------------------------------------|-----------------------------|-----------------------------|--------------------------|--------------------------|
| <b>ACR20</b>                              |                             |                             |                          |                          |
| % (95% CI), week 24                       | 78.1 (74.3–81.9)            | 77.7 (73.9–81.5)            | 74.5 (69.6–79.4)         | 59.2 (54.6–63.7)         |
| Treatment difference vs PBO (95% CI)      | 18.9 (13.0–24.9)            | 18.6 (12.6–24.5)            |                          |                          |
| Exploratory p vs PBO                      | <0.001                      | <0.001                      |                          |                          |
| % (95% CI), week 52                       | 78.3 (74.5–82.1)            | 75.6 (71.7–79.6)            | 73.5 (68.6–78.5)         | N/A                      |
| Treatment difference vs ADA (95% CI)      | 4.8 (–1.5 to 11.1)          | 2.1 (–4.3 to 8.5)           |                          |                          |
| Exploratory p vs ADA                      | 0.10                        | 0.52                        |                          |                          |
| <b>ACR50</b>                              |                             |                             |                          |                          |
| % (95% CI), week 24                       | 57.9 (53.3–62.4)            | 52.7 (48.1–57.3)            | 52.3 (46.7–57.9)         | 33.3 (28.9–37.6)         |
| Treatment difference vs PBO (95% CI)      | 24.6 (18.3–31.0)            | 19.4 (13.1–25.8)            |                          |                          |
| Exploratory p vs PBO                      | <0.001                      | <0.001                      |                          |                          |
| % (95% CI), week 52                       | 62.3 (57.9–66.8)            | 58.5 (54.0–63.1)            | 59.1 (53.6–64.6)         | N/A                      |
| Treatment difference vs ADA (95% CI)      | 3.2 (–3.9 to 10.4)          | –0.5 (–7.7 to 6.7)          |                          |                          |
| Exploratory p vs ADA                      | 0.32                        | 0.87                        |                          |                          |
| <b>ACR70</b>                              |                             |                             |                          |                          |
| % (95% CI), week 24                       | 36.4 (32.0–40.9)            | 30.2 (26.0–34.4)            | 30.2 (25.0–35.3)         | 15.4 (12.0–18.7)         |
| Treatment difference vs PBO (95% CI)      | 21.1 (15.4–26.7)            | 14.8 (9.4–20.3)             |                          |                          |
| Exploratory p vs PBO                      | <0.001                      | <0.001                      |                          |                          |
| % (95% CI), week 52                       | 44.2 (39.6–48.8)            | 37.5 (33.1–41.9)            | 39.4 (33.9–44.9)         | N/A                      |
| Treatment difference vs ADA (95% CI)      | 4.8 (–2.4 to 12.0)          | –1.9 (–9.0 to 5.2)          |                          |                          |
| Exploratory p vs ADA                      | 0.15                        | 0.61                        |                          |                          |
| <b>HAQ-DI change from baseline</b>        |                             |                             |                          |                          |
| <b>Week 24</b>                            |                             |                             |                          |                          |
| N                                         | 418                         | 423                         | 283                      | 376                      |
| Mean ± SD                                 | –0.82 ± 0.63                | –0.75 ± 0.60                | –0.78 ± 0.63             | –0.62 ± 0.60             |
| Treatment difference vs PBO, LSM (95% CI) | –0.27 (–0.34 to –0.19)      | –0.19 (–0.26 to –0.11)      |                          |                          |
| Exploratory p vs PBO                      | <0.001                      | <0.001                      |                          |                          |
| <b>Week 52</b>                            |                             |                             |                          |                          |
| N                                         | 400                         | 398                         | 265                      | N/A                      |
| Mean ± SD                                 | –0.93 ± 0.65                | –0.85 ± 0.62                | –0.85 ± 0.65             | N/A                      |
| Treatment difference vs ADA, LSM (95% CI) | –0.09 (–0.17 to –0.01)      | –0.01 (–0.09 to 0.08)       |                          |                          |
| Exploratory p vs ADA                      | 0.036                       | 0.87                        |                          |                          |



|                                           |                   |                     |                  |                  |
|-------------------------------------------|-------------------|---------------------|------------------|------------------|
| <b>DAS28(CRP) &lt;2.6</b>                 |                   |                     |                  |                  |
| % (95% CI), week 24                       | 48.4 (43.8–53.0)  | 35.2 (30.8–39.6)    | 35.7 (30.3–41.1) | 16.2 (12.8–19.6) |
| Treatment difference vs PBO (95% CI)      | 32.2 (26.4–38.0)  | 19.0 (13.4–24.6)    |                  |                  |
| Exploratory p vs PBO                      | <0.001            | <0.001              |                  |                  |
| % (95% CI), week 52                       | 53.9 (49.3–58.5)  | 42.9 (38.4–47.4)    | 46.2 (40.6–51.7) | N/A              |
| Treatment difference vs ADA (95% CI)      | 7.7 (0.4–15.0)    | –3.2 (–10.5 to 4.0) |                  |                  |
| Exploratory p vs ADA                      | 0.024             | 0.38                |                  |                  |
| <b>DAS28(CRP) ≤3.2</b>                    |                   |                     |                  |                  |
| % (95% CI), week 24                       | 60.6 (56.1–65.1)  | 53.1 (48.6–57.7)    | 50.5 (44.9–56.1) | 33.7 (29.3–38.0) |
| Treatment difference vs PBO (95% CI)      | 26.9 (20.6–33.3)  | 19.4 (13.1–25.8)    |                  |                  |
| Exploratory p vs PBO                      | <0.001            | <0.001              |                  |                  |
| % (95% CI), week 52                       | 65.9 (61.5–70.3)  | 59.4 (54.9–63.9)    | 58.8 (53.3–64.3) | N/A              |
| Treatment difference vs ADA (95% CI)      | 7.1 (0–14.2)      | 0.6 (–6.6 to 7.8)   |                  |                  |
| Exploratory p vs ADA                      | 0.031             | 0.86                |                  |                  |
| <b>SF-36 PCS change from baseline</b>     |                   |                     |                  |                  |
| Week 24                                   |                   |                     |                  |                  |
| N                                         | 424               | 426                 | 283              | 376              |
| Mean ± SD                                 | 10.4 ± 8.5        | 10.3 ± 8.6          | 10.4 ± 8.5       | 7.7 ± 8.0        |
| Treatment difference vs PBO, LSM (95% CI) | 3.1 (2.1–4.1)     | 3.1 (2.0–4.1)       |                  |                  |
| Exploratory p vs PBO                      | <0.001            | <0.001              |                  |                  |
| Week 52                                   |                   |                     |                  |                  |
| N                                         | 399               | 398                 | 265              | N/A              |
| Mean ± SD                                 | 12.0 ± 8.7        | 11.5 ± 8.7          | 12.4 ± 9.2       | N/A              |
| Treatment difference vs ADA, LSM (95% CI) | 0.1 (–1.1 to 1.3) | –0.3 (–1.5 to 0.9)  |                  |                  |
| Exploratory p vs ADA                      | 0.84              | 0.64                |                  |                  |
| <b>FACIT-F change from baseline</b>       |                   |                     |                  |                  |
| Week 24                                   |                   |                     |                  |                  |
| N                                         | 413               | 417                 | 273              | 369              |
| Mean ± SD                                 | 10.5 ± 10.6       | 10.8 ± 10.8         | 10.3 ± 9.7       | 8.4 ± 10.5       |
| Treatment difference vs PBO, LSM (95% CI) | 2.6 (1.5–3.8)     | 2.8 (1.6–3.9)       |                  |                  |
| Exploratory p vs PBO                      | <0.001            | <0.001              |                  |                  |
| Week 52                                   |                   |                     |                  |                  |
| N                                         | 384               | 376                 | 254              | N/A              |
| Mean ± SD                                 | 11.9 ± 10.2       | 12.2 ± 10.9         | 11.7 ± 10.8      | N/A              |
| Treatment difference vs ADA, LSM (95% CI) | 0.7 (–0.6 to 2.0) | 0.8 (–0.5 to 2.1)   |                  |                  |
| Exploratory p vs ADA                      | 0.28              | 0.22                |                  |                  |

|                                                      |                    |                    |                  |                  |
|------------------------------------------------------|--------------------|--------------------|------------------|------------------|
| <b>CDAI ≤10</b>                                      |                    |                    |                  |                  |
| % (95% CI), week 12                                  | 45.9 (41.3–50.5)   | 36.7 (32.3–41.1)   | 38.5 (33.0–43.9) | 23.8 (19.9–27.7) |
| Treatment difference vs PBO (95% CI)                 | 22.1 (16.0–28.2)   | 12.9 (6.9–18.9)    |                  |                  |
| Exploratory p vs PBO                                 | <0.001             | <0.001             |                  |                  |
| Exploratory p for noninferiority vs ADA <sup>a</sup> | <0.001             | 0.045              |                  |                  |
| % (95% CI), week 24                                  | 60.2 (55.7–64.7)   | 50.8 (46.3–55.4)   | 49.5 (43.9–55.1) | 35.6 (31.2–40.0) |
| Treatment difference vs PBO (95% CI)                 | 24.6 (18.3–31.0)   | 15.3 (8.8–21.7)    |                  |                  |
| Exploratory p vs PBO                                 | <0.001             | <0.001             |                  |                  |
| Exploratory p for noninferiority vs ADA <sup>a</sup> | <0.001             | 0.004              |                  |                  |
| % (95% CI), week 52                                  | 66.9 (62.6–71.3)   | 59.2 (54.7–63.7)   | 61.2 (55.8–66.7) | N/A              |
| Treatment difference vs ADA (95% CI)                 | 5.7 (–1.3 to 12.8) | –2.1 (–9.2 to 5.1) |                  |                  |
| Exploratory p vs ADA                                 | 0.077              | 0.55               |                  |                  |
| <b>SDAI ≤11</b>                                      |                    |                    |                  |                  |
| % (95% CI), week 12                                  | 46.9 (42.4–51.5)   | 36.7 (32.3–41.1)   | 38.5 (33.0–43.9) | 24.4 (20.5–28.4) |
| Treatment difference vs PBO (95% CI)                 | 22.5 (16.4–28.7)   | 12.2 (6.2–18.2)    |                  |                  |
| Exploratory p vs PBO                                 | <0.001             | <0.001             |                  |                  |
| % (95% CI), week 24                                  | 60.2 (55.7–64.7)   | 52.5 (47.9–57.1)   | 50.5 (44.9–56.1) | 35.4 (31.0–39.8) |
| Treatment difference vs PBO (95% CI)                 | 24.8 (18.5–31.2)   | 17.1 (10.7–23.5)   |                  |                  |
| Exploratory p vs PBO                                 | <0.001             | <0.001             |                  |                  |
| % (95% CI), week 52                                  | 67.4 (63.0–71.7)   | 59.6 (55.1–64.1)   | 60.0 (54.5–65.5) | N/A              |
| Treatment difference vs ADA (95% CI)                 | 7.4 (0.3–14.4)     | –0.4 (–7.6 to 6.7) |                  |                  |
| Exploratory p vs ADA                                 | 0.025              | 0.91               |                  |                  |
| <b>CDAI ≤2.8</b>                                     |                    |                    |                  |                  |
| % (95% CI), week 12                                  | 12.4 (9.3–15.5)    | 11.0 (8.1–13.9)    | 5.8 (3.1–8.6)    | 2.7 (1.2–4.3)    |
| Treatment difference vs PBO (95% CI)                 | 9.7 (6.2–13.2)     | 8.3 (4.9–11.7)     |                  |                  |
| Exploratory p vs PBO                                 | <0.001             | <0.001             |                  |                  |
| Exploratory p for noninferiority vs ADA <sup>a</sup> | <0.001             | <0.001             |                  |                  |
| % (95% CI), week 24                                  | 21.3 (17.5–25.0)   | 18.5 (15.0–22.1)   | 16.9 (12.7–21.2) | 8.4 (5.8–11.0)   |
| Treatment difference vs PBO (95% CI)                 | 12.8 (8.2–17.5)    | 10.1 (5.6–14.6)    |                  |                  |
| Exploratory p vs PBO                                 | <0.001             | <0.001             |                  |                  |
| Exploratory p for noninferiority vs ADA <sup>a</sup> | <0.001             | 0.006              |                  |                  |
| % (95% CI), week 52                                  | 29.5 (25.3–33.7)   | 24.2 (20.2–28.1)   | 22.8 (18.1–27.5) | N/A              |
| Treatment difference vs ADA (95% CI)                 | 6.7 (0.3–13.1)     | 1.4 (–4.8 to 7.6)  |                  |                  |
| Exploratory p vs ADA                                 | 0.028              | 0.62               |                  |                  |
| <b>SDAI ≤3.3</b>                                     |                    |                    |                  |                  |
| % (95% CI), week 12                                  | 12.8 (9.7–16.0)    | 9.4 (6.7–12.1)     | 6.8 (3.9–9.7)    | 2.9 (1.3–4.6)    |

|                                      |                    |                   |                  |               |
|--------------------------------------|--------------------|-------------------|------------------|---------------|
| Treatment difference vs PBO (95% CI) | 9.9 (6.3–13.5)     | 6.4 (3.2–9.7)     |                  |               |
| Exploratory p vs PBO                 | <0.001             | <0.001            |                  |               |
| % (95% CI), week 24                  | 23.2 (19.3–27.1)   | 17.5 (14.0–21.0)  | 16.9 (12.7–21.2) | 7.2 (4.7–9.6) |
| Treatment difference vs PBO (95% CI) | 16.0 (11.3–20.7)   | 10.3 (6.0–14.7)   |                  |               |
| Exploratory p vs PBO                 | <0.001             | <0.001            |                  |               |
| % (95% CI), week 52                  | 29.7 (25.5–33.9)   | 24.6 (20.6–28.5)  | 24.0 (19.2–28.8) | N/A           |
| Treatment difference vs ADA (95% CI) | 5.7 (–0.8 to 12.1) | 0.6 (–5.7 to 6.9) |                  |               |
| Exploratory p vs ADA                 | 0.064              | 0.82              |                  |               |
| <b>Boolean remission</b>             |                    |                   |                  |               |
| % (95% CI), week 12                  | 9.5 (6.7–12.2)     | 6.5 (4.2–8.8)     | 5.2 (2.7–7.8)    | 1.9 (0.6–3.2) |
| Treatment difference vs PBO (95% CI) | 7.6 (4.5–10.7)     | 4.6 (1.8–7.3)     |                  |               |
| Exploratory p vs PBO                 | <0.001             | <0.001            |                  |               |
| % (95% CI), week 24                  | 18.5 (14.9–22.1)   | 13.8 (10.6–16.9)  | 13.2 (9.4–17.1)  | 4.8 (2.8–6.9) |
| Treatment difference vs PBO (95% CI) | 13.7 (9.5–17.9)    | 8.9 (5.1–12.8)    |                  |               |
| Exploratory p vs PBO                 | <0.001             | <0.001            |                  |               |
| % (95% CI), week 52                  | 22.5 (18.7–26.4)   | 19.2 (15.5–22.8)  | 16.9 (12.7–21.2) | N/A           |
| Treatment difference vs ADA (95% CI) | 5.6 (–0.2 to 11.4) | 2.2 (–3.4 to 7.9) |                  |               |
| Exploratory p vs ADA                 | 0.044              | 0.38              |                  |               |

Comparisons vs ADA were for superiority unless otherwise indicated.

<sup>a</sup>Post hoc exploratory analysis.

ACR20, 20% improvement from baseline in American College of Rheumatology core criteria; ADA, adalimumab; CDAI, Clinical Disease

Activity Index; CI, confidence interval; DAS28(CRP), Disease Activity Score in 28 joints with C-reactive protein; FACIT-F, Functional

Assessment of Chronic Illness Therapy-Fatigue; FIL100, filgotinib 100 mg; FIL200, filgotinib 200 mg; HAQ-DI, Health Assessment

Questionnaire-Disability Index; LSM, least squares mean; N/A, not applicable; PBO, placebo; SD, standard deviation; SDAI, Simplified Disease

Activity Index; SF-36 PCS, Short Form-36 Physical Component Summary.

**Table S4.** Radiographic progression from baseline through week 52

|                                           | <b>FIL200<br/>(n = 475)</b> | <b>FIL100<br/>(n = 480)</b> | <b>ADA<br/>(n = 325)</b> | <b>PBO<br/>(n = 475)</b> |
|-------------------------------------------|-----------------------------|-----------------------------|--------------------------|--------------------------|
| <b>Campaign A</b>                         |                             |                             |                          |                          |
| Patients evaluated, n                     |                             |                             |                          |                          |
| Baseline                                  | 467                         | 471                         | 319                      | 466                      |
| Change from baseline at week 12           | 426                         | 438                         | 282                      | 408                      |
| Change from baseline at week 24           | 405                         | 404                         | 271                      | 351                      |
| <b>mTSS</b>                               |                             |                             |                          |                          |
| Baseline, mean ± SD                       | 32.5 ± 48.0                 | 36.7 ± 53.1                 | 34.8 ± 55.0              | 31.6 ± 53.2              |
| Change from baseline at week 12, LSM ± SE | 0.08 ± 0.08                 | 0.12 ± 0.08                 | 0.13 ± 0.09              | 0.25 ± 0.09              |
| Treatment difference vs PBO, LSM (95% CI) | -0.18 (-0.30 to -0.06)      | -0.14 (-0.25 to -0.02)      |                          |                          |
| Exploratory p vs PBO                      | 0.004                       | 0.026                       |                          |                          |
| Change from baseline at week 24, LSM ± SE | 0.13 ± 0.09                 | 0.15 ± 0.09                 | 0.19 ± 0.10              | 0.40 ± 0.09              |
| Treatment difference vs PBO, LSM (95% CI) | -0.27 (-0.43 to -0.12)      | -0.25 (-0.40 to -0.10)      |                          |                          |
| p vs PBO                                  | <0.001                      | 0.001                       |                          |                          |
| Treatment difference vs ADA, LSM (95% CI) | -0.05 (-0.22 to 0.12)       | -0.03 (-0.20 to 0.14)       |                          |                          |
| Exploratory p vs ADA                      | 0.54                        | 0.71                        |                          |                          |
| <b>Erosion score</b>                      |                             |                             |                          |                          |
| Baseline, mean ± SD                       | 13.9 ± 24.2                 | 16.8 ± 27.3                 | 15.2 ± 28.7              | 14.0 ± 28.1              |
| Change from baseline at week 12, LSM ± SE | 0.03 ± 0.05                 | 0.05 ± 0.05                 | 0.05 ± 0.05              | 0.14 ± 0.05              |
| Treatment difference vs PBO, LSM (95% CI) | -0.11 (-0.18 to -0.05)      | -0.10 (-0.16 to -0.03)      |                          |                          |
| Exploratory p vs PBO                      | <0.001                      | 0.004                       |                          |                          |
| Change from baseline at week 24, LSM ± SE | 0.03 ± 0.05                 | 0.06 ± 0.05                 | 0.06 ± 0.06              | 0.22 ± 0.05              |
| Treatment difference vs PBO, LSM (95% CI) | -0.19 (-0.27 to -0.10)      | -0.16 (-0.24 to -0.07)      |                          |                          |
| Exploratory p vs PBO                      | <0.001                      | <0.001                      |                          |                          |
| <b>Joint space narrowing</b>              |                             |                             |                          |                          |
| Baseline, mean ± SD                       | 18.5 ± 25.6                 | 19.9 ± 27.3                 | 19.6 ± 28.2              | 17.6 ± 26.9              |
| Change from baseline at week 12, LSM ± SE | 0.05 ± 0.06                 | 0.07 ± 0.06                 | 0.09 ± 0.06              | 0.11 ± 0.06              |
| Treatment difference vs PBO, LSM (95% CI) | -0.06 (-0.15 to 0.02)       | -0.04 (-0.12 to 0.04)       |                          |                          |
| Exploratory p vs PBO                      | 0.14                        | 0.36                        |                          |                          |
| Change from baseline at week 24, LSM ± SE | 0.10 ± 0.06                 | 0.09 ± 0.06                 | 0.12 ± 0.07              | 0.19 ± 0.07              |
| Treatment difference vs PBO, LSM (95% CI) | -0.09 (-0.19 to 0.02)       | -0.09 (-0.20 to 0.01)       |                          |                          |
| Exploratory p vs PBO                      | 0.11                        | 0.078                       |                          |                          |

| <b>Combined Campaign A and Campaign B</b>     |                        |                        |             |             |
|-----------------------------------------------|------------------------|------------------------|-------------|-------------|
| Patients evaluated at week 52, n <sup>a</sup> | 417                    | 411                    | 273         | N/A         |
| <b>mTSS</b>                                   |                        |                        |             |             |
| Change from baseline at week 24, LSM ± SE     | 0.10 ± 0.10            | 0.19 ± 0.10            | 0.17 ± 0.11 | 0.49 ± 0.10 |
| Treatment difference vs PBO, LSM (95% CI)     | -0.39 (-0.54 to -0.24) | -0.30 (-0.45 to -0.15) |             |             |
| Exploratory p vs PBO                          | <0.001                 | <0.001                 |             |             |
| Treatment difference vs ADA, LSM (95% CI)     | -0.07 (-0.23 to 0.09)  | 0.02 (-0.14 to 0.18)   |             |             |
| Exploratory p vs ADA                          | 0.40                   | 0.80                   |             |             |
| Change from baseline at week 52, LSM ± SE     | 0.18 ± 0.12            | 0.45 ± 0.12            | 0.61 ± 0.13 | N/A         |
| Treatment difference vs ADA, LSM (95% CI)     | -0.43 (-0.66 to -0.20) | -0.15 (-0.38 to 0.08)  |             |             |
| Exploratory p vs ADA                          | <0.001                 | 0.19                   |             |             |
| <b>Erosion score</b>                          |                        |                        |             |             |
| Change from baseline at week 24, LSM ± SE     | 0.04 ± 0.06            | 0.08 ± 0.06            | 0.06 ± 0.06 | 0.27 ± 0.06 |
| Treatment difference vs PBO, LSM (95% CI)     | -0.22 (-0.31 to -0.14) | -0.18 (-0.27 to -0.10) |             |             |
| Exploratory p vs PBO                          | <0.001                 | <0.001                 |             |             |
| Treatment difference vs ADA, LSM (95% CI)     | -0.01 (-0.11 to 0.08)  | 0.03 (-0.07 to 0.12)   |             |             |
| Exploratory p vs ADA                          | 0.76                   | 0.57                   |             |             |
| Change from baseline at week 52, LSM ± SE     | 0.06 ± 0.07            | 0.19 ± 0.07            | 0.28 ± 0.08 | N/A         |
| Treatment difference vs ADA, LSM (95% CI)     | -0.22 (-0.35 to -0.09) | -0.09 (-0.23 to 0.04)  |             |             |
| Exploratory p vs ADA                          | 0.001                  | 0.18                   |             |             |
| <b>Joint space narrowing</b>                  |                        |                        |             |             |
| Change from baseline at week 24, LSM ± SE     | 0.06 ± 0.06            | 0.11 ± 0.06            | 0.11 ± 0.07 | 0.23 ± 0.07 |
| Treatment difference vs PBO, LSM (95% CI)     | -0.17 (-0.26 to -0.08) | -0.12 (-0.22 to -0.03) |             |             |
| Exploratory p vs PBO                          | <0.001                 | 0.012                  |             |             |
| Treatment difference vs ADA, LSM (95% CI)     | -0.05 (-0.16 to 0.05)  | -0.01 (-0.11 to 0.10)  |             |             |
| Exploratory p vs ADA                          | 0.29                   | 0.90                   |             |             |
| Change from baseline at week 52, LSM ± SE     | 0.12 ± 0.07            | 0.26 ± 0.07            | 0.32 ± 0.08 | N/A         |
| Treatment difference vs ADA, LSM (95% CI)     | -0.21 (-0.34 to -0.07) | -0.06 (-0.19 to 0.07)  |             |             |
| Exploratory p vs ADA                          | 0.002                  | 0.36                   |             |             |

<sup>a</sup>Patient numbers are not reported for the combined analyses due to the change from baseline including both Campaign A and Campaign B. ADA, adalimumab; CI, confidence interval; FIL100, filgotinib 100 mg; FIL200, filgotinib 200 mg; LSM, least squares mean; mTSS, van der Heijde modified total Sharp score; N/A, not applicable; PBO, placebo; SD, standard deviation; SE, standard error.

**Table S5.** Change from baseline in other ACR and DAS28(CRP) core measure components at weeks 12, 24, and 52

|                                           | <b>FIL200</b><br>(n = 475) | <b>FIL100</b><br>(n = 480) | <b>ADA</b><br>(n = 325) | <b>PBO</b><br>(n = 475) |
|-------------------------------------------|----------------------------|----------------------------|-------------------------|-------------------------|
| <b>TJC68</b>                              |                            |                            |                         |                         |
| Week 12                                   |                            |                            |                         |                         |
| N                                         | 458                        | 458                        | 311                     | 435                     |
| Mean ± SD                                 | -17 ± 11.1                 | -15 ± 10.7                 | -15 ± 9.9               | -13 ± 11.6              |
| Treatment difference vs PBO, LSM (95% CI) | -4 (-5 to -2)              | -3 (-4 to -1)              |                         |                         |
| Exploratory p vs PBO                      | <0.001                     | <0.001                     |                         |                         |
| Treatment difference vs ADA, LSM (95% CI) | -1 (-3 to -0)              | -0 (-2 to 1)               |                         |                         |
| Exploratory p vs ADA                      | 0.015                      | 0.47                       |                         |                         |
| Week 24                                   |                            |                            |                         |                         |
| N                                         | 418                        | 423                        | 283                     | 375                     |
| Mean ± SD                                 | -20 ± 12.1                 | -19 ± 10.9                 | -18 ± 11.1              | -17 ± 11.7              |
| Treatment difference vs PBO, LSM (95% CI) | -3 (-4 to -2)              | -2 (-3 to -1)              |                         |                         |
| Exploratory p vs PBO                      | <0.001                     | <0.001                     |                         |                         |
| Treatment difference vs ADA, LSM (95% CI) | -2 (-3 to -1)              | -1 (-2 to 0)               |                         |                         |
| Exploratory p vs ADA                      | 0.001                      | 0.16                       |                         |                         |
| Week 52                                   |                            |                            |                         |                         |
| N                                         | 400                        | 397                        | 265                     |                         |
| Mean ± SD                                 | -21 ± 12.2                 | -21 ± 11.4                 | -20 ± 11.4              |                         |
| Treatment difference vs ADA, LSM (95% CI) | -1 (-2 to -0)              | -0 (-1 to 1)               |                         |                         |
| Exploratory p vs ADA                      | 0.015                      | 0.68                       |                         |                         |
| <b>TJC28</b>                              |                            |                            |                         |                         |
| Week 12                                   |                            |                            |                         |                         |
| N                                         | 458                        | 458                        | 311                     | 435                     |
| Mean ± SD                                 | -10 ± 6.4                  | -9 ± 6.2                   | -9 ± 5.7                | -8 ± 6.7                |
| Treatment difference vs PBO, LSM (95% CI) | -2 (-3 to -2)              | -1 (-2 to -1)              |                         |                         |
| Exploratory p vs PBO                      | <0.001                     | <0.001                     |                         |                         |
| Treatment difference vs ADA, LSM (95% CI) | -1 (-2 to -0)              | -0 (-1 to 1)               |                         |                         |
| Exploratory p vs ADA                      | 0.026                      | 0.83                       |                         |                         |
| Week 24                                   |                            |                            |                         |                         |
| N                                         | 418                        | 423                        | 283                     | 375                     |
| Mean ± SD                                 | -12 ± 6.2                  | -12 ± 6.1                  | -11 ± 6.1               | -11 ± 6.2               |
| Treatment difference vs PBO, LSM (95% CI) | -2 (-3 to -2)              | -2 (-2 to -1)              |                         |                         |

|                                           |               |               |           |           |
|-------------------------------------------|---------------|---------------|-----------|-----------|
| Exploratory p vs PBO                      | <0.001        | <0.001        |           |           |
| Treatment difference vs ADA, LSM (95% CI) | -1 (-2 to -0) | -0 (-1 to 0)  |           |           |
| Exploratory p vs ADA                      | 0.002         | 0.19          |           |           |
| <b>Week 52</b>                            |               |               |           |           |
| N                                         | 400           | 397           | 265       |           |
| Mean ± SD                                 | -13 ± 6.0     | -12 ± 6.0     | -12 ± 5.8 |           |
| Treatment difference vs ADA, LSM (95% CI) | -1 (-1 to -0) | -0 (-0 to 0)  |           |           |
| Exploratory p vs ADA                      | 0.012         | 0.99          |           |           |
| <b>SJC66</b>                              |               |               |           |           |
| <b>Week 12</b>                            |               |               |           |           |
| N                                         | 458           | 458           | 311       | 435       |
| Mean ± SD                                 | -11 ± 7.5     | -11 ± 8.1     | -11 ± 7.1 | -10 ± 8.4 |
| Treatment difference vs PBO, LSM (95% CI) | -2 (-3 to -1) | -2 (-2 to -1) |           |           |
| Exploratory p vs PBO                      | <0.001        | <0.001        |           |           |
| Treatment difference vs ADA, LSM (95% CI) | -1 (-2 to 0)  | -0 (-1 to 0)  |           |           |
| Exploratory p vs ADA                      | 0.060         | 0.38          |           |           |
| <b>Week 24</b>                            |               |               |           |           |
| N                                         | 418           | 423           | 283       | 375       |
| Mean ± SD                                 | -13 ± 7.8     | -13 ± 7.4     | -13 ± 6.9 | -12 ± 7.7 |
| Treatment difference vs PBO, LSM (95% CI) | -2 (-3 to -1) | -1 (-2 to -1) |           |           |
| Exploratory p vs PBO                      | <0.001        | <0.001        |           |           |
| Treatment difference vs ADA, LSM (95% CI) | -1 (-2 to -0) | -0 (-1 to 0)  |           |           |
| Exploratory p vs ADA                      | 0.004         | 0.52          |           |           |
| <b>Week 52</b>                            |               |               |           |           |
| N                                         | 400           | 397           | 265       |           |
| Mean ± SD                                 | -14 ± 8.1     | -13 ± 7.6     | -14 ± 7.5 |           |
| Treatment difference vs ADA, LSM (95% CI) | -1 (-1 to -0) | -0 (-1 to 0)  |           |           |
| Exploratory p vs ADA                      | 0.018         | 0.60          |           |           |
| <b>SJC28</b>                              |               |               |           |           |
| <b>Week 12</b>                            |               |               |           |           |
| N                                         | 458           | 458           | 311       | 435       |
| Mean ± SD                                 | -8 ± 5.2      | -8 ± 5.4      | -8 ± 4.9  | -7 ± 5.5  |
| Treatment difference vs PBO, LSM (95% CI) | -2 (-2 to -1) | -1 (-2 to -1) |           |           |
| Exploratory p vs PBO                      | <0.001        | <0.001        |           |           |
| Treatment difference vs ADA, LSM (95% CI) | -0 (-1 to 0)  | -0 (-1 to 0)  |           |           |
| Exploratory p vs ADA                      | 0.088         | 0.60          |           |           |

|                                           |                  |                 |            |            |
|-------------------------------------------|------------------|-----------------|------------|------------|
| Week 24                                   |                  |                 |            |            |
| N                                         | 418              | 423             | 283        | 375        |
| Mean ± SD                                 | -10 ± 5.0        | -9 ± 5.0        | -9 ± 4.7   | -8 ± 5.2   |
| Treatment difference vs PBO, LSM (95% CI) | -2 (-2 to -1)    | -1 (-1 to -1)   |            |            |
| Exploratory p vs PBO                      | <0.001           | <0.001          |            |            |
| Treatment difference vs ADA, LSM (95% CI) | -1 (-1 to -0)    | -0 (-1 to 0)    |            |            |
| Exploratory p vs ADA                      | 0.001            | 0.71            |            |            |
| Week 52                                   |                  |                 |            |            |
| N                                         | 400              | 397             | 265        |            |
| Mean ± SD                                 | -10 ± 5.1        | -9 ± 5.0        | -10 ± 4.7  |            |
| Treatment difference vs ADA, LSM (95% CI) | -0 (-1 to -0)    | -0 (-0 to 0)    |            |            |
| Exploratory p vs ADA                      | 0.010            | 0.68            |            |            |
| <b>SGA, mm</b>                            |                  |                 |            |            |
| Week 12                                   |                  |                 |            |            |
| N                                         | 457              | 458             | 311        | 435        |
| Mean ± SD                                 | -33 ± 24.8       | -28 ± 24.7      | -28 ± 23.2 | -21 ± 24.8 |
| Treatment difference vs PBO, LSM (95% CI) | -13 (-16 to -10) | -10 (-12 to -7) |            |            |
| Exploratory p vs PBO                      | <0.001           | <0.001          |            |            |
| Treatment difference vs ADA, LSM (95% CI) | -5 (-8 to -1)    | -1 (-4 to 2)    |            |            |
| Exploratory p vs ADA                      | 0.005            | 0.43            |            |            |
| Week 24                                   |                  |                 |            |            |
| N                                         | 418              | 423             | 283        | 376        |
| Mean ± SD                                 | -39 ± 25.8       | -36 ± 24.9      | -36 ± 24.9 | -31 ± 26.9 |
| Treatment difference vs PBO, LSM (95% CI) | -11 (-14 to -7)  | -8 (-11 to -5)  |            |            |
| Exploratory p vs PBO                      | <0.001           | <0.001          |            |            |
| Treatment difference vs ADA, LSM (95% CI) | -3 (-6 to 1)     | -1 (-4 to 3)    |            |            |
| Exploratory p vs ADA                      | 0.097            | 0.69            |            |            |
| Week 52                                   |                  |                 |            |            |
| N                                         | 400              | 398             | 265        |            |
| Mean ± SD                                 | -44 ± 24.4       | -41 ± 25.4      | -42 ± 25.7 |            |
| Treatment difference vs ADA, LSM (95% CI) | -2 (-5 to 1)     | 1 (-3 to 4)     |            |            |
| Exploratory p vs ADA                      | 0.28             | 0.75            |            |            |
| <b>PGA, mm</b>                            |                  |                 |            |            |
| Week 12                                   |                  |                 |            |            |
| N                                         | 457              | 450             | 308        | 433        |
| Mean ± SD                                 | -41 ± 20.2       | -39 ± 20.3      | -39 ± 20.4 | -34 ± 22.4 |



|                                           |                 |                 |            |            |
|-------------------------------------------|-----------------|-----------------|------------|------------|
| Treatment difference vs PBO, LSM (95% CI) | -8 (-10 to -6)  | -7 (-10 to -5)  |            |            |
| Exploratory p vs PBO                      | <0.001          | <0.001          |            |            |
| Treatment difference vs ADA, LSM (95% CI) | -3 (-5 to -0)   | -2 (-5 to 1)    |            |            |
| Exploratory p vs ADA                      | 0.030           | 0.14            |            |            |
| Week 24                                   |                 |                 |            |            |
| N                                         | 413             | 419             | 283        | 373        |
| Mean ± SD                                 | -48 ± 19.2      | -46 ± 19.6      | -47 ± 19.4 | -42 ± 20.4 |
| Treatment difference vs PBO, LSM (95% CI) | -8 (-11 to -6)  | -7 (-10 to -5)  |            |            |
| Exploratory p vs PBO                      | <0.001          | <0.001          |            |            |
| Treatment difference vs ADA, LSM (95% CI) | -2 (-4 to 0)    | -1 (-3 to 1)    |            |            |
| Exploratory p vs ADA                      | 0.11            | 0.43            |            |            |
| Week 52                                   |                 |                 |            |            |
| N                                         | 400             | 398             | 265        |            |
| Mean ± SD                                 | -53 ± 18.2      | -50 ± 19.2      | -52 ± 18.9 |            |
| Treatment difference vs ADA, LSM (95% CI) | -1 (-3 to 1)    | 1 (-2 to 3)     |            |            |
| Exploratory p vs ADA                      | 0.32            | 0.63            |            |            |
| <b>Patient pain assessment, mm</b>        |                 |                 |            |            |
| Week 12                                   |                 |                 |            |            |
| N                                         | 457             | 458             | 311        | 435        |
| Mean ± SD                                 | -31 ± 26.9      | -29 ± 25.3      | -27 ± 23.6 | -21 ± 26.0 |
| Treatment difference vs PBO, LSM (95% CI) | -12 (-15 to -9) | -10 (-13 to -7) |            |            |
| Exploratory p vs PBO                      | <0.001          | <0.001          |            |            |
| Treatment difference vs ADA, LSM (95% CI) | -4 (-7 to -1)   | -2 (-5 to 2)    |            |            |
| Exploratory p vs ADA                      | 0.018           | 0.32            |            |            |
| Week 24                                   |                 |                 |            |            |
| N                                         | 418             | 423             | 283        | 376        |
| Mean ± SD                                 | -38 ± 27.0      | -37 ± 25.6      | -35 ± 24.2 | -30 ± 27.0 |
| Treatment difference vs PBO, LSM (95% CI) | -11 (-14 to -7) | -9 (-12 to -6)  |            |            |
| Exploratory p vs PBO                      | <0.001          | <0.001          |            |            |
| Treatment difference vs ADA, LSM (95% CI) | -3 (-6 to 1)    | -2 (-5 to 2)    |            |            |
| Exploratory p vs ADA                      | 0.096           | 0.35            |            |            |
| Week 52                                   |                 |                 |            |            |
| N                                         | 400             | 398             | 265        |            |
| Mean ± SD                                 | -43 ± 26.2      | -41 ± 25.9      | -41 ± 25.6 |            |
| Treatment difference vs ADA, LSM (95% CI) | -2 (-5 to 2)    | -0 (-4 to 3)    |            |            |
| Exploratory p vs ADA                      | 0.31            | 0.83            |            |            |

| <b>hsCRP, mg/L</b>                        |                     |                     |             |             |
|-------------------------------------------|---------------------|---------------------|-------------|-------------|
| <b>Week 12</b>                            |                     |                     |             |             |
| N                                         | 456                 | 454                 | 308         | 431         |
| Mean ± SD                                 | -11.0 ± 18.7        | -9.6 ± 21.3         | -7.8 ± 20.6 | -3.3 ± 22.7 |
| Treatment difference vs PBO, LSM (95% CI) | -8.0 (-9.9 to -6.1) | -6.5 (-8.3 to -4.6) |             |             |
| Exploratory p vs PBO                      | <0.001              | <0.001              |             |             |
| Treatment difference vs ADA, LSM (95% CI) | -1.8 (-3.8 to 0.3)  | -0.2 (-2.3 to 1.9)  |             |             |
| Exploratory p vs ADA                      | 0.094               | 0.84                |             |             |
| <b>Week 24</b>                            |                     |                     |             |             |
| N                                         | 416                 | 419                 | 281         | 370         |
| Mean ± SD                                 | -11.8 ± 20.7        | -10.5 ± 22.2        | -6.2 ± 24.2 | -4.0 ± 19.6 |
| Treatment difference vs PBO, LSM (95% CI) | -7.9 (-9.9 to -5.9) | -6.6 (-8.6 to -4.6) |             |             |
| Exploratory p vs PBO                      | <0.001              | <0.001              |             |             |
| Treatment difference vs ADA, LSM (95% CI) | -4.5 (-6.6 to -2.3) | -3.2 (-5.3 to -1.0) |             |             |
| Exploratory p vs ADA                      | <0.001              | 0.004               |             |             |
| <b>Week 52</b>                            |                     |                     |             |             |
| N                                         | 396                 | 386                 | 259         |             |
| Mean ± SD                                 | -12.2 ± 20.8        | -11.3 ± 23.1        | -9.6 ± 16.5 |             |
| Treatment difference vs ADA, LSM (95% CI) | -0.4 (-1.8 to 0.9)  | 0.8 (-0.5 to 2.2)   |             |             |
| Exploratory p vs ADA                      | 0.53                | 0.23                |             |             |

Missing change scores were not imputed.

Comparisons vs ADA were for superiority.

ACR, American College of Rheumatology; ADA, adalimumab; CI, confidence interval; DAS28(CRP), Disease Activity Score in 28 joints with C-reactive protein; FIL100, filgotinib 100 mg; FIL200, filgotinib 200 mg; hsCRP, high-sensitivity C-reactive protein; LSM, least squares mean; PBO, placebo; PGA, Physician Global Assessment; SD, standard deviation; SGA, Subject Global Assessment; SJC28, swollen joint count in 28 joints; SJC66, swollen joint count in 66 joints; TJC28, tender joint count in 28 joints; TJC68, tender joint count in 68 joints.

**Table S6.** Proportions of patients achieving ACR20 at week 12 by region grouped by standard of care

|         | <b>FIL200</b>  | <b>FIL100</b>  | <b>ADA</b>     | <b>PBO</b>     |
|---------|----------------|----------------|----------------|----------------|
| Group A | 77/108 (71.3)  | 66/104 (63.5)  | 46/73 (63.0)   | 39/105 (37.1)  |
| Group B | 199/259 (76.8) | 193/267 (72.3) | 132/175 (75.4) | 146/261 (55.9) |
| Group C | 40/48 (83.3)   | 37/50 (74.0)   | 28/35 (80.0)   | 29/49 (59.2)   |
| Group D | 17/20 (85.0)   | 12/18 (66.7)   | 8/14 (57.1)    | 9/22 (40.9)    |
| Group E | 31/40 (77.5)   | 27/41 (65.9)   | 15/28 (53.6)   | 14/38 (36.8)   |

Data shown as n/N (%).

Group A, United States of America, Australia, New Zealand, Republic of Korea, Belgium, Germany, Italy, United Kingdom, South Africa, Canada, Spain, Ireland, Israel, and The Netherlands; Group B, Bulgaria, Czech Republic, Hungary, Slovakia, India, Ukraine, Poland, Romania, Russia, and Serbia; Group C, Argentina and Mexico; Group D, Hong Kong, Thailand, and Taiwan; Group E, Japan.

See **Figure S2** for enrolment by country within each group.

ACR20, 20% improvement from baseline by American College of Rheumatology core criteria; ADA, adalimumab; FIL100, filgotinib 100 mg; FIL200, filgotinib 200 mg; PBO, placebo.

**Table S7.** ACR20, ACR50, and ACR70 response rates from Figure 2

| Week | FIL200<br>(n = 475) |       |       | FIL100<br>(n = 480) |       |       | ADA<br>(n = 325) |       |       | PBO<br>(n = 475) |       |       |
|------|---------------------|-------|-------|---------------------|-------|-------|------------------|-------|-------|------------------|-------|-------|
|      | ACR20               | ACR50 | ACR70 | ACR20               | ACR50 | ACR70 | ACR20            | ACR50 | ACR70 | ACR20            | ACR50 | ACR70 |
| 2    | 37.3                | 9.1   | 2.7   | 27.5                | 5.8   | 1.3   | 33.5             | 6.8   | 0.9   | 14.9             | 1.1   | 0.4   |
| 4    | 51.6                | 22.3  | 9.1   | 45.6                | 12.9  | 3.3   | 47.1             | 17.2  | 3.7   | 31.8             | 5.9   | 1.5   |
| 8    | 69.7                | 35.6  | 17.3  | 63.3                | 26.9  | 11.5  | 61.2             | 27.7  | 11.7  | 42.5             | 16.8  | 4.4   |
| 12   | 76.6                | 47.2  | 26.1  | 69.8                | 36.5  | 18.5  | 70.5             | 35.1  | 14.2  | 49.9             | 19.8  | 6.7   |
| 14   | 81.5                | 52.8  | 32.4  | 76.9                | 46.7  | 23.3  | 73.5             | 44.6  | 21.2  | 62.1             | 27.8  | 10.3  |
| 16   | 80.2                | 55.4  | 33.9  | 76.7                | 49.2  | 25.2  | 72.9             | 45.5  | 22.8  | 60.4             | 30.7  | 12.4  |
| 20   | 81.5                | 55.6  | 34.1  | 77.7                | 50.8  | 26    | 73.5             | 51.4  | 25.2  | 59.4             | 33.7  | 12.8  |
| 24   | 78.1                | 57.9  | 36.2  | 77.7                | 52.7  | 29.6  | 74.5             | 52.3  | 29.5  | 59.2             | 33.3  | 14.9  |
| 26   | 77.9                | 59.8  | 38.1  | 75.8                | 52.9  | 29.4  | 74.2             | 54.8  | 31.1  |                  |       |       |
| 30   | 80.2                | 60.4  | 38.7  | 77.5                | 55.6  | 32.1  | 74.2             | 54.8  | 32    |                  |       |       |
| 36   | 79.6                | 61.3  | 39.8  | 76.5                | 56.5  | 34.4  | 73.8             | 56.3  | 32    |                  |       |       |
| 44   | 79.4                | 62.1  | 42.1  | 77.7                | 57.1  | 35.8  | 71.7             | 56    | 39.1  |                  |       |       |
| 52   | 78.3                | 62.3  | 44.2  | 75.6                | 58.5  | 37.5  | 73.5             | 59.1  | 39.4  |                  |       |       |

ACR20/50/70, 20%/50%/70% improvement from baseline based on American College of Rheumatology Criteria; ADA, adalimumab; FIL100,

filgotinib 100 mg; FIL200, filgotinib 200 mg; PBO, placebo.

**Figure S1.** Hierarchical testing of secondary endpoints

|                                                                                                                                       | P-value in trial    |
|---------------------------------------------------------------------------------------------------------------------------------------|---------------------|
| 1) Superiority of filgotinib 100 mg compared with placebo based on ACR20 response rate at week 12                                     | <0.001              |
| 2) Superiority of filgotinib 200 mg compared with placebo based on the change from baseline in HAQ-DI at week 12                      | <0.001              |
| 3) Superiority of filgotinib 100 mg compared with placebo based on the change from baseline in HAQ-DI at week 12                      | <0.001              |
| 4) Superiority of filgotinib 200 mg compared with placebo based on the proportion of subjects with DAS28(CRP) <2.6 at week 12         | <0.001              |
| 5) Superiority of filgotinib 100 mg compared with placebo based on the proportion of subjects with DAS28(CRP) <2.6 at week 12         | <0.001              |
| 6) Superiority of filgotinib 200 mg compared with placebo based on the change from baseline in mTSS at week 24                        | <0.001              |
| 7) Superiority of filgotinib 100 mg compared with placebo based on the change from baseline in mTSS at week 24                        | 0.001               |
| 8) Non-inferiority of filgotinib 200 mg compared with adalimumab based on the proportion of subjects with DAS28(CRP) ≤3.2 at week 12  | <0.001              |
| 9) Non-inferiority of filgotinib 100 mg compared with adalimumab based on the proportion of subjects with DAS28(CRP) ≤3.2 at week 12  | 0.054               |
| 10) Superiority of filgotinib 200 mg compared with placebo based on the change from baseline in SF-36PCS at week 12                   | <0.001 <sup>a</sup> |
| 11) Superiority of filgotinib 100 mg compared with placebo based on the change from baseline in SF-36PCS at week 12                   | <0.001 <sup>a</sup> |
| 12) Superiority of filgotinib 200 mg compared with placebo based on the change from baseline in FACIT-Fatigue at week 12              | <0.001 <sup>a</sup> |
| 13) Superiority of filgotinib 100 mg compared with placebo based on the change from baseline in FACIT-Fatigue at week 12              | <0.001 <sup>a</sup> |
| 14) Superiority of filgotinib 200 mg compared with adalimumab based on the proportion of subjects with DAS28(CRP) ≤3.2 at week 12     | 0.069 <sup>a</sup>  |
| 15) Superiority of filgotinib 100 mg compared with adalimumab based on the proportion of subjects with DAS28(CRP) ≤3.2 at week 12     | 0.18 <sup>a</sup>   |
| 16) Non-inferiority of filgotinib 200 mg compared with adalimumab based on the proportion of subjects with DAS28(CRP) <2.6 at week 12 | <0.001 <sup>a</sup> |
| 17) Non-inferiority of filgotinib 100 mg compared with adalimumab based on the proportion of subjects with DAS28(CRP) <2.6 at week 12 | 0.002 <sup>a</sup>  |
| 18) Superiority of filgotinib 200 mg compared with adalimumab based on the proportion of subjects with DAS28(CRP) <2.6 at week 12     | 0.001 <sup>a</sup>  |
| 19) Superiority of filgotinib 100 mg compared with adalimumab based on the proportion of subjects with DAS28(CRP) <2.6 at week 12     | 0.99 <sup>a</sup>   |

First non-significant result shown in red. Subsequent results not adjusted for multiplicity are shaded gray.

<sup>a</sup>Exploratory p value.

ACR20, 20% improvement from baseline in American College of Rheumatology core criteria;

DAS28(CRP), Disease Activity Score in 28 joints with C-reactive protein; FACIT, Functional

Assessment of Chronic Illness Therapy; HAQ-DI, Health Assessment Questionnaire-Disability Index;

mTSS, van der Heijde modified total Sharp score; SF-36, Short Form-36 Physical Component Summary.

**Figure S2.** Treated patients by country of enrollment and group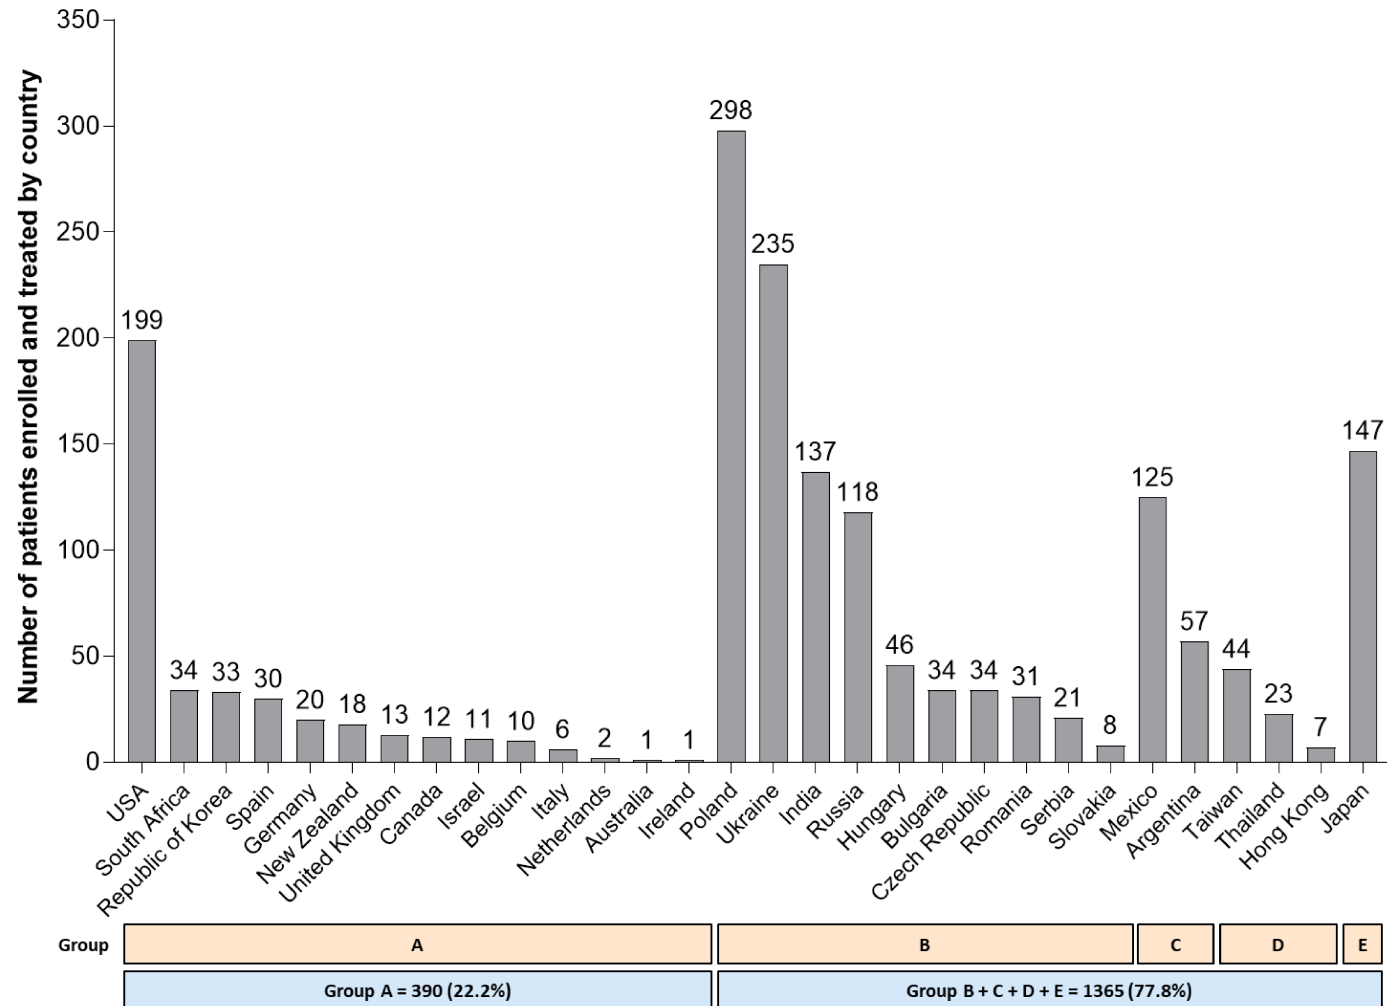

**Figure S3.** Radiographic progression through week 52. **A)** mTSS change from baseline, **B)** erosion score change from baseline, and **C)** joint space narrowing change from baseline

**A)**

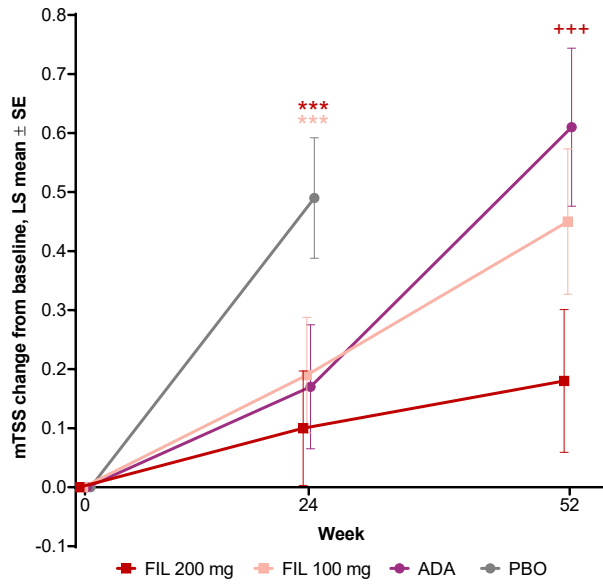

**B)**

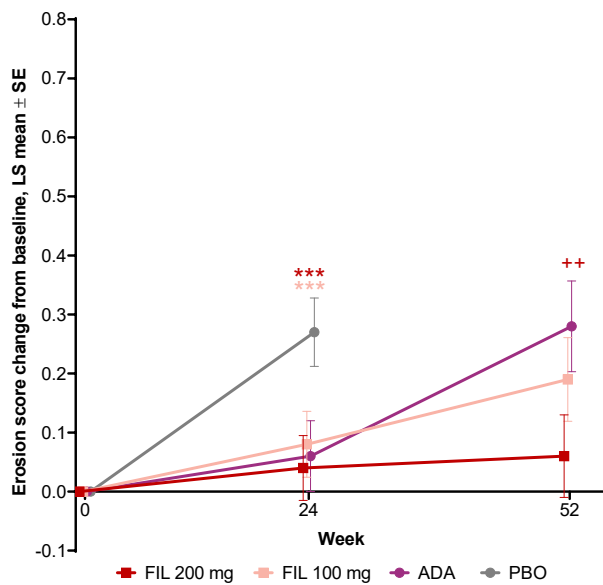

C)

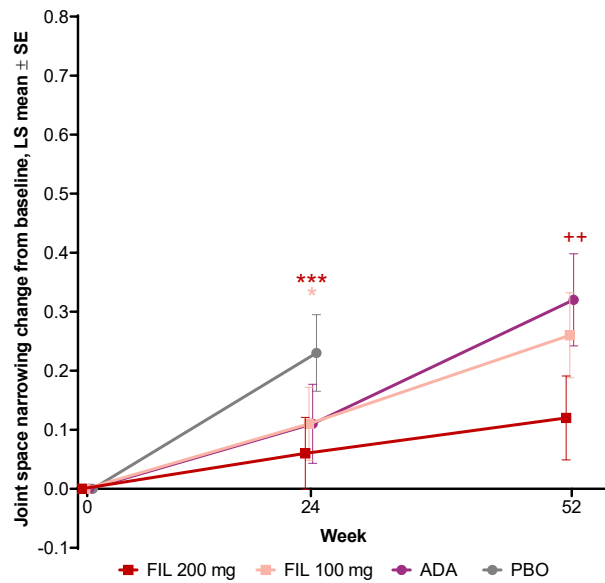

Combined data from Campaign A (through week 24) and Campaign B (through week 52 including rereading of baseline and week 24) are shown. Supporting values are shown in **Table S4**.

Error bars represent the SE of the LS mean.

\*Exploratory  $p < 0.05$ , \*\*\*exploratory  $p < 0.001$  vs PBO.

++Exploratory  $p < 0.01$ , +++exploratory  $p < 0.001$  vs ADA.

ADA, adalimumab; FIL, filgotinib; LS, least-squares; mTSS, van der Heijde modified total Sharp score;

PBO, placebo; SE, standard error.
